# Supplementary material
Source: PubMed Central journal article supplement (PMC7327463)

**A**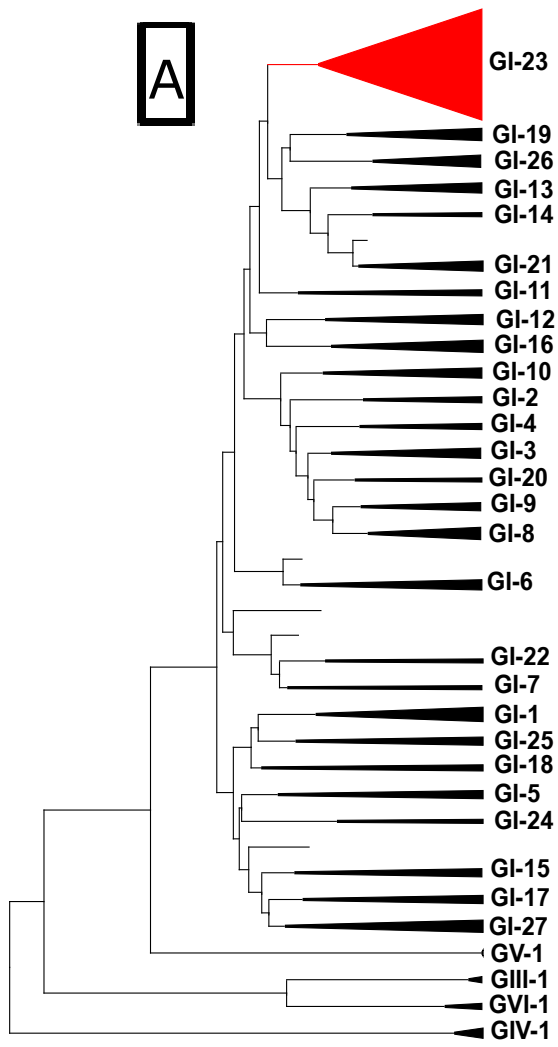**B**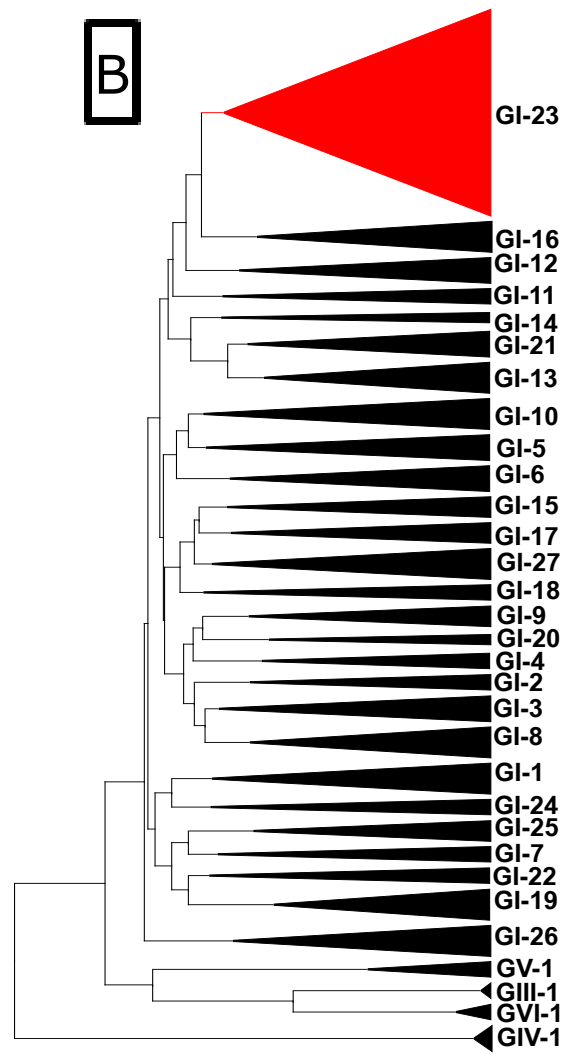

Supplement: mmc2.pdf [file mmc2.pdf]

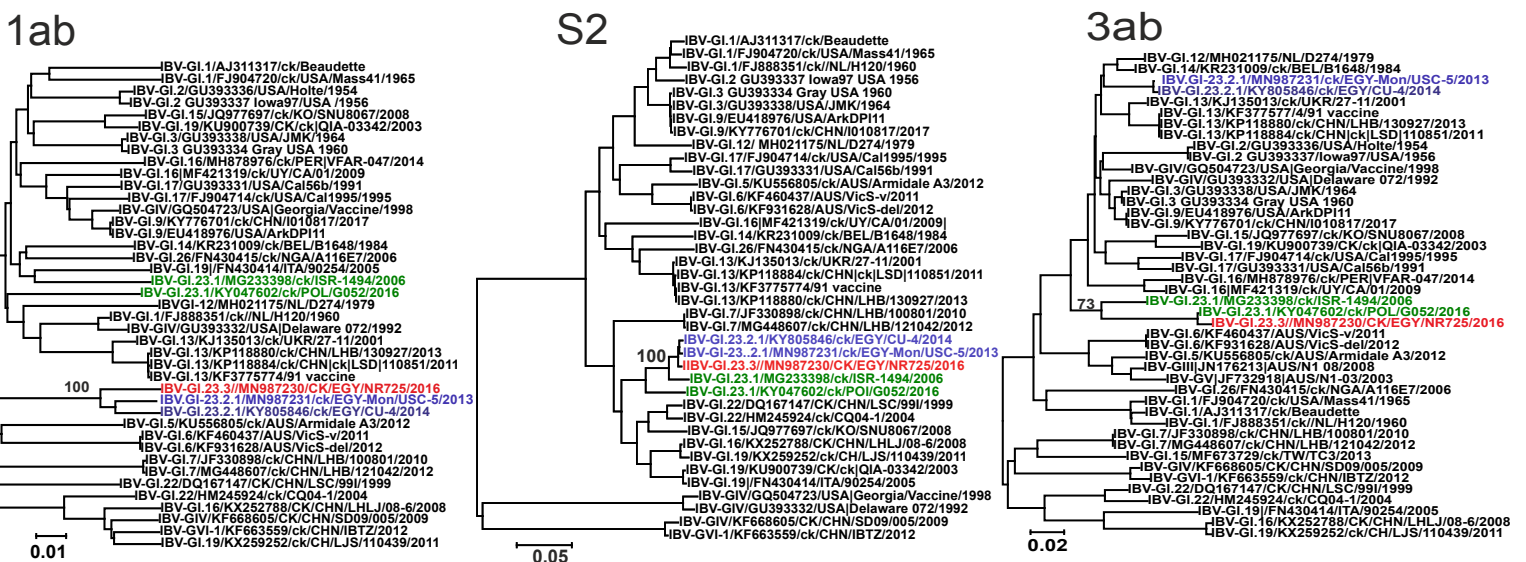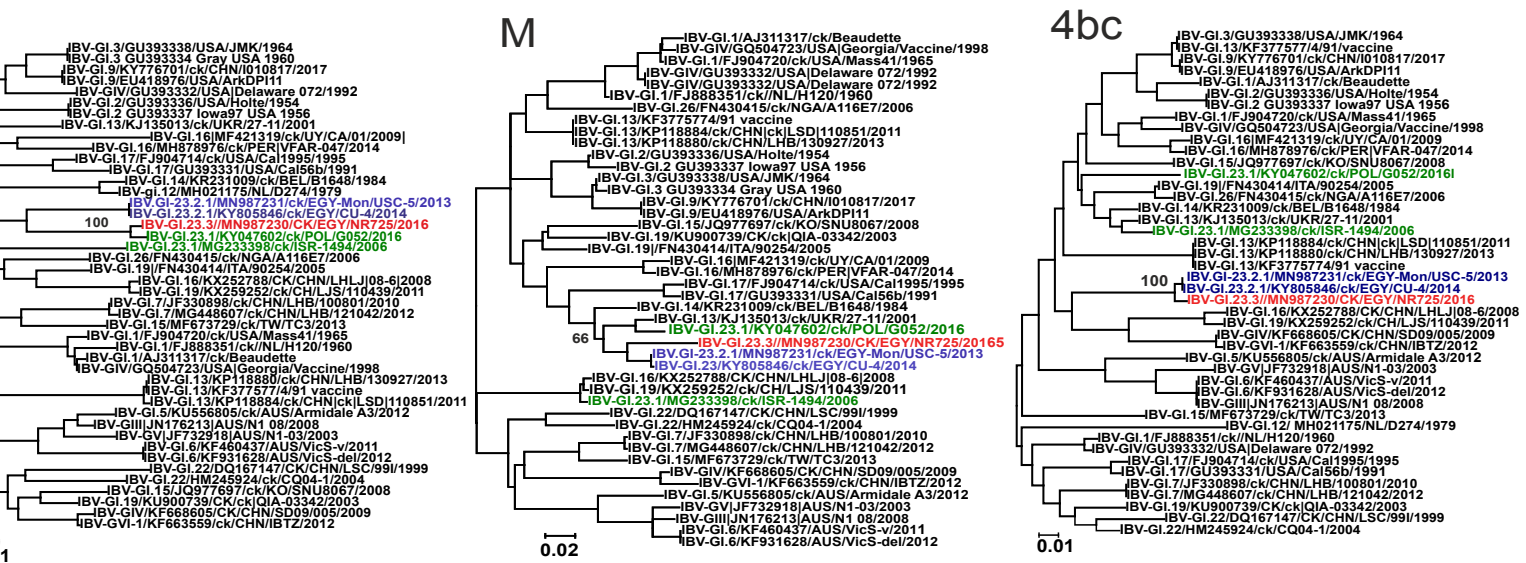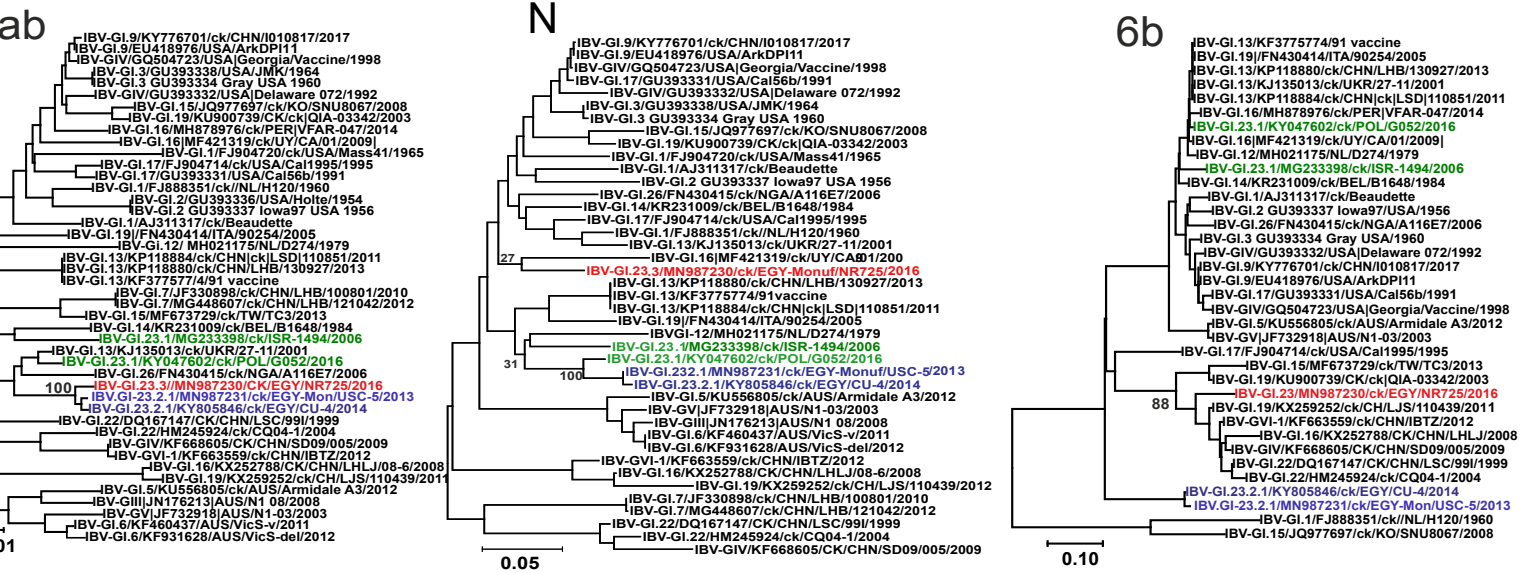

Supplement: mmc3.pdf [file mmc3.pdf]
